# Supplementary material for: Multi-stimuli-responsive composite fibers based on luminescent ceramics for UV/heat detection and anti-counterfeiting
Source: Royal Society of Chemistry journal article supplement (doi:10.1039/d1tc03403k), 2021-01-01
Supplement: d1tc03403k1.pdf [file d1tc03403k1.pdf]

## Multi-Stimuli-Responsive Composite Fibers Based on Luminescent Ceramics for UV/Heat Detection and Anti-counterfeiting

Xiuyu Shen<sup>a</sup>, Qian Hu<sup>b</sup>, Abdolhamid Akbarzadeh<sup>c,d</sup>, Chen Shi<sup>a</sup>, Zengyuan Pang<sup>a</sup>,  
Mingqiao Ge<sup>a,\*</sup>

<sup>a</sup>College Textile Science and engineering, Jiangnan University, Wuxi 214122, China

<sup>b</sup>School of Food Science and Technology, Jiangnan University, Wuxi 214122, China

<sup>c</sup>Department of Bioresource Engineering, McGill University, Montreal, PQ H9X 3V9, Canada

<sup>d</sup>Department of Mechanical Engineering, McGill University, Montreal, QC H3A 0C3, Canada

\*Address correspondence to Mingqiao Ge, Email: ge\_mingqiao@126.com, Tel: +86-510-85912329,

Fax: +86-510-85912329

### 1. The optimization of $\text{Y}_2\text{O}_2\text{S}:\text{Eu}^{3+}, \text{Mg}^{2+}, \text{Ti}^{4+}$

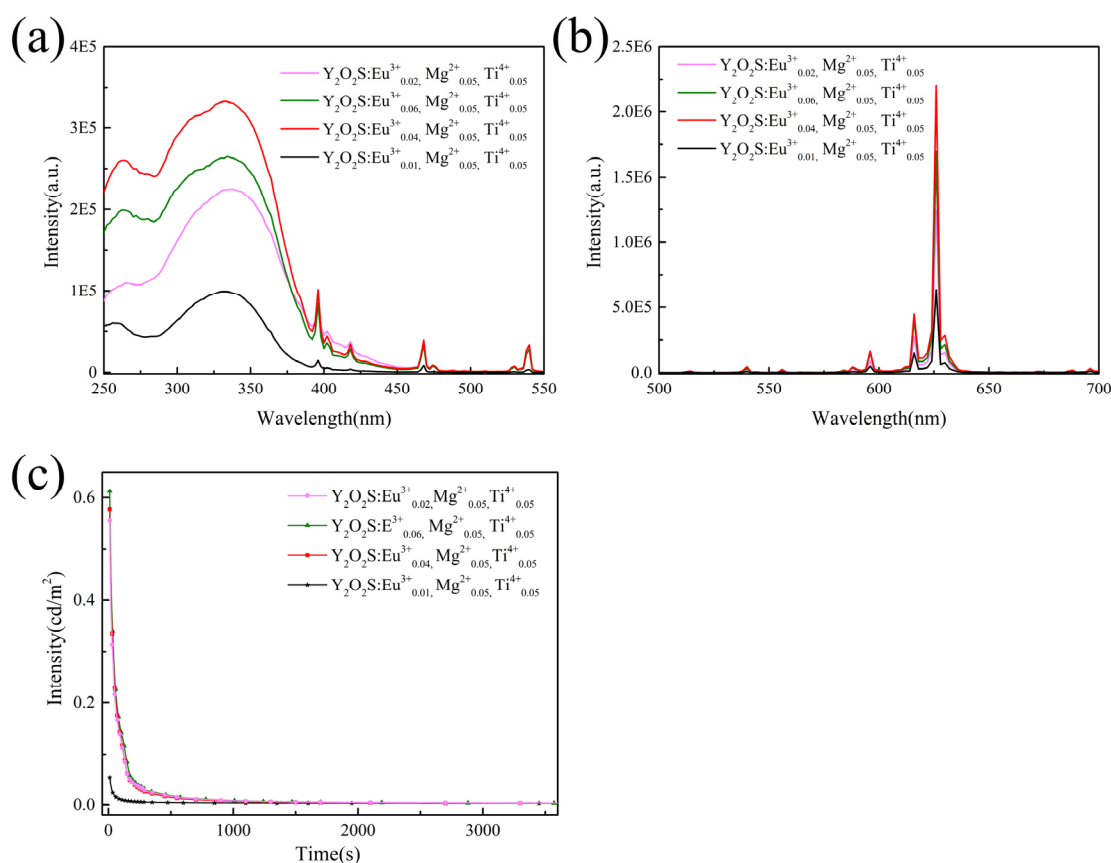

**Fig. S1** The (a) excitation spectra, (b) emission spectra and (c) afterglow decay curves of  $\text{Y}_2\text{O}_2\text{S}:\text{Eu}^{3+}, \text{Mg}^{2+}, \text{Ti}^{4+}$  phosphors with different  $\text{Eu}^{3+}$  co-doping concentrations.

As shown in Fig S1 (a) and (b), all emission and excitation spectra of  $\text{Y}_2\text{O}_2\text{S}:\text{Eu}^{3+}$ ,

Mg<sup>2+</sup>, Ti<sup>4+</sup> phosphors with different Eu<sup>3+</sup> co-doping concentrations present similar pattern. The main excitation peak of samples is in the range of 300-350 nm, which is ascribed to the O<sup>2-</sup>-Eu<sup>3+</sup> CTB (charge transfer band) and S<sup>2-</sup>(3p)-Eu<sup>3+</sup> CTB respectively, the narrow peaks appear at 396 nm, 468 nm and 540 nm are due to the f-f CT of Eu<sup>3+</sup>. As shown in Fig 1 (b), the strong red-emission peaks locating at 626nm and 616 nm are due to the transition from <sup>5</sup>D<sub>0</sub> -<sup>7</sup>F<sub>2</sub> of Eu<sup>3+</sup> while some weaker and narrower peaks are ascribed to the <sup>5</sup>D<sub>J</sub> (J=0, 1, 2)-<sup>7</sup>F<sub>J</sub> (J=0, 1, 2, 3, 4) of Eu<sup>3+</sup> ion. It is obvious that the luminescent intensity of Y<sub>2</sub>O<sub>2</sub>S:Eu<sup>3+</sup><sub>0.04</sub>, Mg<sup>2+</sup><sub>0.05</sub>, Ti<sup>4+</sup><sub>0.05</sub> is the strongest. Furthermore, the afterglow decay curves of samples under the UV-radiation for 15 min also prove that the persistent luminescent property of Y<sub>2</sub>O<sub>2</sub>S:Eu<sup>3+</sup><sub>0.04</sub>, Mg<sup>2+</sup><sub>0.05</sub>, Ti<sup>4+</sup><sub>0.05</sub> is brilliant, although the initial intensity is slightly weaker than Y<sub>2</sub>O<sub>2</sub>S:Eu<sup>3+</sup><sub>0.06</sub>, Mg<sup>2+</sup><sub>0.05</sub>, Ti<sup>4+</sup><sub>0.05</sub>. Considering the luminescent intensity and the persistent luminescent property, the Y<sub>2</sub>O<sub>2</sub>S:Eu<sup>3+</sup><sub>0.04</sub>, Mg<sup>2+</sup><sub>0.05</sub>, Ti<sup>4+</sup><sub>0.05</sub> can be applied in multi-stimuli-responsive fibers.

## 2. SEM images of 5% and 7% multi-stimuli-responsive fibers

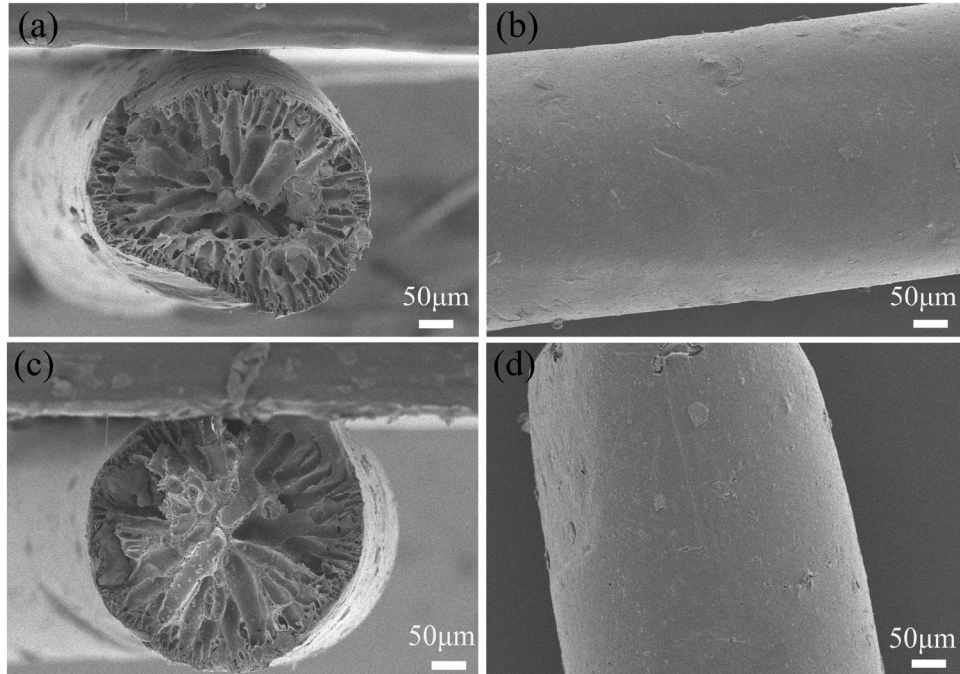

**Fig. S2** SEM images of (a) surface, (b) section of 5% multi-stimuli-responsive fibers; (c) surface, (d) section of 7% multi-stimuli-responsive fibers.

### 3. Sectional elemental distribution maps of 3% multi-stimuli-responsive fibers.

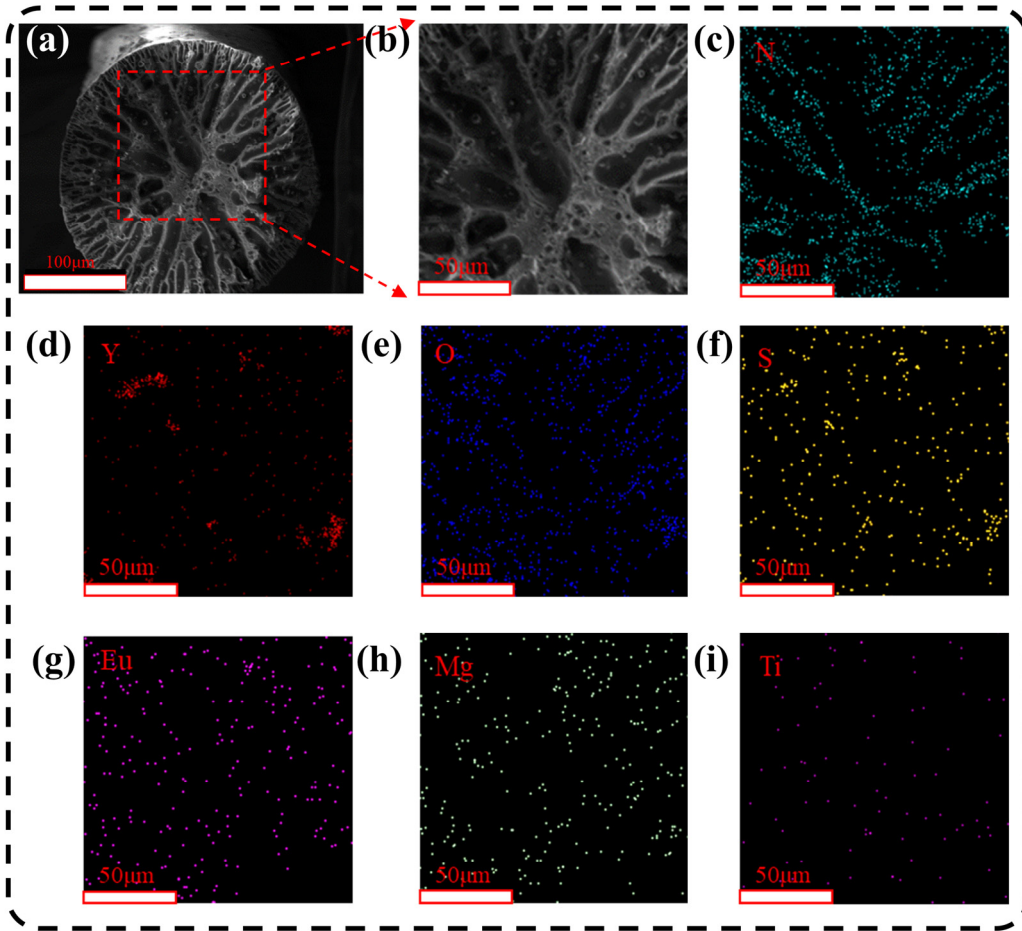

**Fig. S3** Sectional elemental distribution maps of 3% multi-stimuli-responsive fibers.

### 4. PL properties of 3% and 5% multi-stimuli-responsive fibers

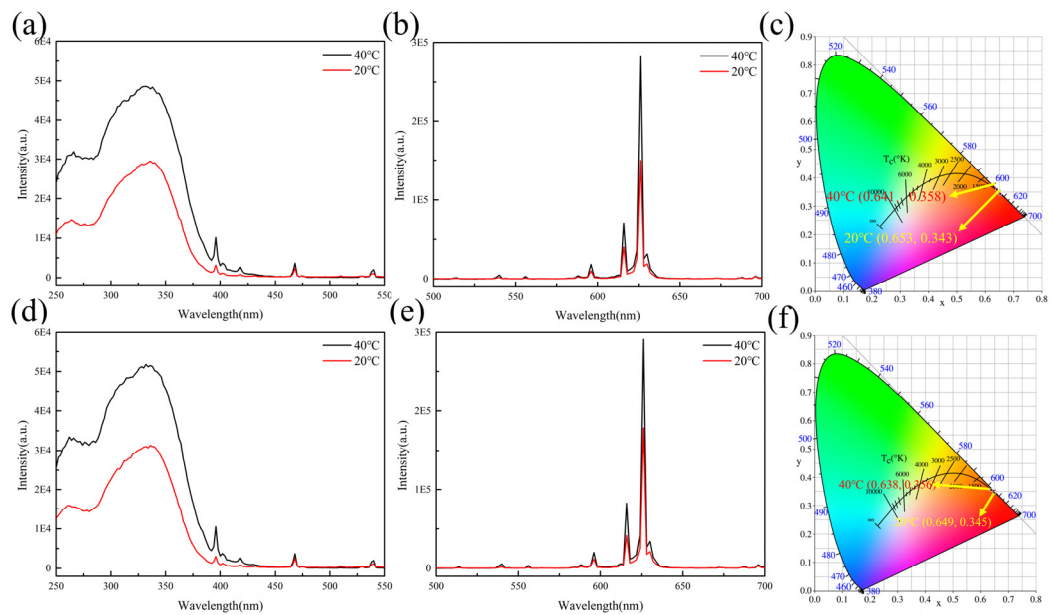

---

Fig. S4 (a) Excitation spectra ( $\lambda_{em}=627nm$ ) and (b) emission spectra ( $\lambda_{ex}=330nm$ ) of 5% multi-stimuli-responsive fibers at 20°C and 40°C; (c) color distribution of 5% multi-stimuli-responsive fibers at different temperature in CIE 1931. (d) Excitation spectra ( $\lambda_{em}=627nm$ ) and (e) emission spectra ( $\lambda_{ex}=330nm$ ) of 3% multi-stimuli-responsive fibers at 20°C and 40°C; (f) color distribution of 3% multi-stimuli-responsive fibers at different temperature in CIE 1931.
